# Supplementary material for: Clinical Application of the Association between Genetic Alteration and Intraoperative Fluorescence Activity of 5-Aminolevulinic Acid during the Resection of Brain Metastasis of Lung Adenocarcinoma
Source: MDPI journal article supplement (doi:10.3390/cancers16010088), 2023-12-23
Supplement: s1 [file s1]

Supplementary Table S1. List of Genes of ONCOaccuPanel for Next Generation Sequencing.

| Partial Exon and Hot Spot (98 genes) |        |         |          |          |          |         |         |         |        |         |         |        |        |          |
|--------------------------------------|--------|---------|----------|----------|----------|---------|---------|---------|--------|---------|---------|--------|--------|----------|
| AIBG                                 | ABCC5  | ACVR2A  | ADAMTS18 | ADNP     | AKAP7    | AP1S1   | ARV1    | ASH1L   | BAX    | BTBK    | CASD1   | CBL    | CBX4   | CCDC73   |
| CD3G                                 | CDH26  | CEBPZ   | CENPV    | CIC      | CKAP2    | CLOCK   | COBL1   | CPEB2   | CRIPAK | DLC1    | DNAH12  | DOCK3  | DPAGT1 | DYNC1H2  |
| EBPL                                 | EPPK1  | FBXL3   | FGFBP1   | FMN2     | FRG2B    | FXR1    | GRIN3B  | GTPBP2  | IFITM1 | IFITM3  | IMPA1   | INO80E | IRS1   | KCTD16   |
| KLF4                                 | KNSTRN | KRT32   | LIPT1    | MADCAM1  | MAX      | MFS14A  | MFS14B  | MVK     | MYO1A  | NFE2L2  | NIPA2   | NNAT   | NOS3   | NOTCH2NL |
| NUDT7                                | OR4M2  | PABPC1  | PCBP1    | PCDHB16  | PCMTD1   | PPP2R1A | PREX2   | PRIM2   | RAC1   | RASA4   | RBBP8   | RGS12  | RHOA   | RUFY2    |
| SEC63                                | SF3B1  | SLC23A2 | SPRR3    | SSTR4    | STAMBPL1 | STAT3   | STAU2   | SULT6B1 | SYNJ2  | TAS2R19 | TAS2R31 | TCF7L2 | TEAD2  | TMEM60   |
| TMPRSS13                             | TPSD1  | U2AF1   | WDR55    | WDR87    | ZFP37    | ZNF141  | ZNF563  |         |        |         |         |        |        |          |
| Entire Coding Gene Exons (225 genes) |        |         |          |          |          |         |         |         |        |         |         |        |        |          |
| ALK                                  | BRCA1  | BRCA2   | BRAF     | EGFR     | ERBB2    | IDH1    | IDH2    | KRAS    | KIT    | MYC     | MYCN    | NRAS   | PDGFRA | NTRK1    |
| RET                                  | ROS1   | ABL1    | ABL2     | ABRAXAS1 | AKT1     | AKT2    | AKT3    | APC     | AR     | ARAF    | ARID1A  | ARID1B | ARID2  | ASXL1    |
| ATM                                  | ATR    | ATRX    | AURKA    | AURKB    | AURKC    | AXIN1   | AXL     | BAP1    | BARD1  | BRD2    | BRD3    | BRD4   | BRIP1  | CBFB     |
| CCND1                                | CCND2  | CCND3   | CCNE1    | CD274    | CDH1     | CDK12   | CDK4    | CDK6    | CDKN1A | CDKN1B  | CDKN2A  | CDKN2B | CDKN2C | CEBPA    |
| CHEK2                                | CREBBP | CSF1R   | CTNNB1   | DDR1     | DDR2     | DDX3X   | DNMT3A  | DOT1L   | DPYD   | EPHA3   | EPHB4   | ERBB3  | ERBB4  | ERCC2    |
| ERCC4                                | ERG    | ERF1    | ESR1     | ETV1     | ETV4     | ETV5    | ETV6    | EWSR1   | EZH2   | FANCA   | FANCB   | FANCC  | FANCD2 | FANCE    |
| FANCF                                | FANCG  | FANCI   | FANCL    | FANCM    | FBXW7    | FGF19   | FGF4    | FGFR1   | FGFR2  | FGFR3   | FGFR4   | FLCN   | FLT1   | FLT3     |
| FLT4                                 | FOXL2  | FUBP    | GATA2    | GEN1     | GNA11    | GNAQ    | GNAS    | H3F3A   | HDAC9  | HGF     | HLA-A   | HLA-B  | HLA-C  | HLA-DRB1 |
| HNF1A                                | HRAS   | IGF1R   | IGF2     | JAK1     | JAK2     | JAK3    | KDR     | KMT2A   | LRP1B  | LTK     | MAP2K1  | MAP2K2 | MAP2K4 | MAP3K1   |
| MAP3K4                               | MAPK1  | MAPK3   | MAPK8    | MCL1     | MDM2     | MDM4    | MED12   | MEN1    | MET    | MITF    | MLH1    | MPL    | MRE11  | MSH2     |
| MSH6                                 | MTAP   | MTOR    | NBN      | NF1      | NF2      | NFKB1A  | NKX2-1  | NOTCH1  | NOTCH2 | NOTCH3  | NOTCH4  | NTRK2  | NTRK3  | NUTM1    |
| PBRM1                                | PDGFB  | PDGFRB  | PIK3CA   | PIK3CB   | PIK3CD   | PIK3R1  | PIK3R2  | PMS2    | POLE   | PPARG   | PTCH1   | PTCH2  | PTEN   | PITPN1   |
| PALB2                                | PARP1  | RAD50   | RAD51    | RAD51C   | RAD51D   | RAF1    | RARA    | RB1     | RICTOR | RNF43   | RSPO1   | RSPO2  | RUNX1  | SDHA     |
| SDHB                                 | SDHC   | SDHD    | SETD2    | SLX4     | SMAD2    | SMAD4   | SMARCA4 | SMARCB1 | SMO    | SOX2    | SOX9    | SPOP   | SRC    | STK11    |
| SYK                                  | TERT   | TEI2    | TMPRSS2  | TOP1     | TOP2A    | TP53    | TSC1    | TSC2    | UBE2T  | VHL     | WT1     | XPO1   | XRCC2  | ZNRF3    |
